# Supplementary material for: Structural and homotop optimization of neutral Al–Si nanoclusters
Source: Royal Society of Chemistry journal article supplement (doi:10.1039/c8cp03233e), 2018-01-01
Supplement: c8cp03233e1.pdf [file c8cp03233e1.pdf]

# Structural and homotop optimization of neutral Al-Si nanoclusters

Ana D. P. Silveira , Alexandre C. R. Gomes and Breno R. L. Galvão

Supplementary Information

## **Part I**

Probability distribution of the energy for homotops of the 13 atoms structures.

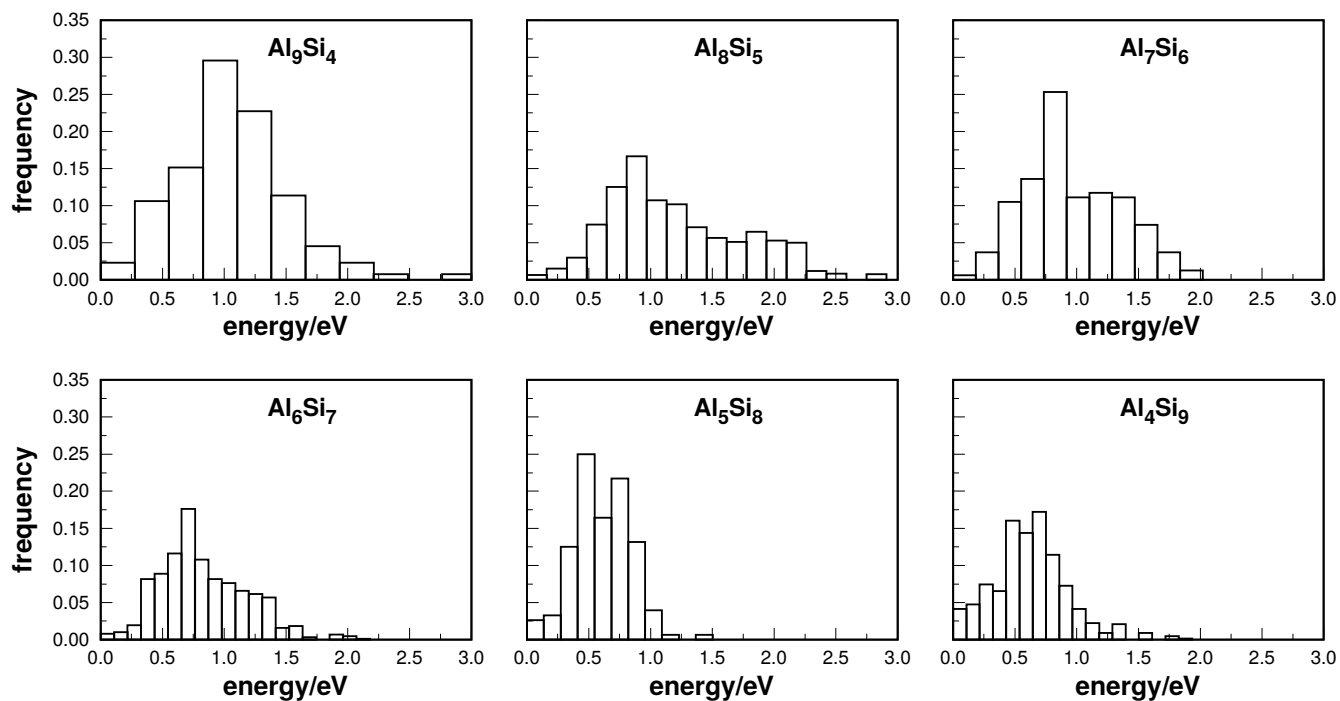

**Figure 1:** Probability distribution of the energy of the homotops for the HCTP structure. The zero of energy in each case corresponds to that of the best homotop obtained.

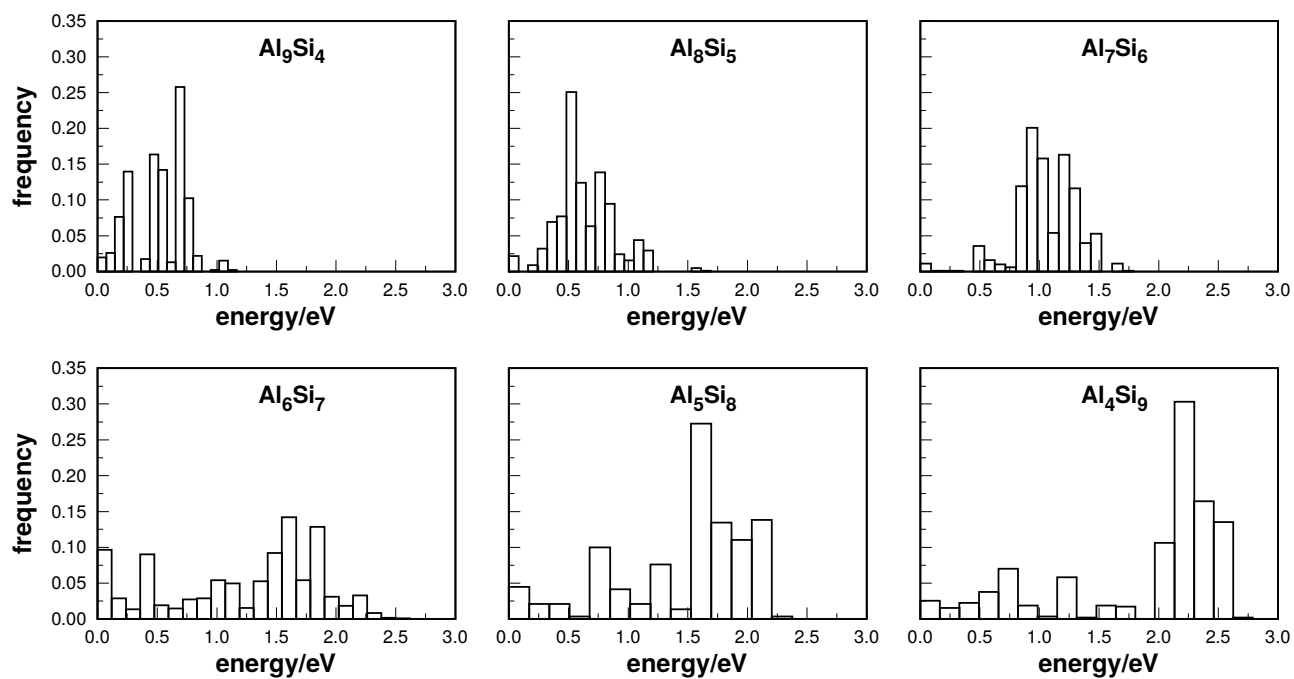

**Figure 2:** Probability distribution of the energy of the homotops for the icosahedral structure. The zero of energy in each case corresponds to that of the best homotop obtained.

## **Part II**

Cartesian coordinates for the putative global minimum  
for each composition at the MP2/cc-pVDZ level

|        |               |               |               |
|--------|---------------|---------------|---------------|
| 2      |               |               |               |
| Al1Si1 |               |               |               |
| AL     | 0.0000000000  | 0.0000000000  | 1.0857393744  |
| SI     | 0.0000000000  | 0.0000000000  | -1.1758223744 |
| 2      |               |               |               |
| Al2Si0 |               |               |               |
| AL     | 0.0000000000  | 0.0000000000  | 1.2345674789  |
| AL     | 0.0000000000  | 0.0000000000  | -1.3246504789 |
| 2      |               |               |               |
| Al0Si2 |               |               |               |
| SI     | 0.0000000000  | 0.0000000000  | 0.9982457427  |
| SI     | 0.0000000000  | 0.0000000000  | -1.0883287427 |
| 3      |               |               |               |
| Al1Si2 |               |               |               |
| SI     | 0.1365187929  | 1.2374616024  | -0.0000000000 |
| AL     | -1.3173726140 | -0.6215928950 | 0.0000000000  |
| SI     | 1.2758898212  | -0.6710877075 | 0.0000000000  |
| 3      |               |               |               |
| Al2Si1 |               |               |               |
| AL     | 0.1160345010  | 1.3855063295  | 0.0000000000  |
| AL     | -1.1958428437 | -0.7049222082 | -0.0000000000 |
| SI     | 1.1748443426  | -0.7358031213 | 0.0000000000  |
| 3      |               |               |               |
| Al3Si0 |               |               |               |
| AL     | 0.0846842135  | 1.4386385714  | 0.0000000000  |
| AL     | -1.2566902196 | -0.7009483587 | -0.0000000000 |
| AL     | 1.2670420061  | -0.7929092128 | 0.0000000000  |
| 3      |               |               |               |
| Al0Si3 |               |               |               |
| SI     | 0.0810605633  | 1.1135504933  | 0.0000000000  |
| SI     | -1.3844660065 | -0.5236884686 | 0.0000000000  |
| SI     | 1.3984414432  | -0.6450810247 | 0.0000000000  |
| 4      |               |               |               |
| Al1Si3 |               |               |               |
| SI     | 0.0000000000  | 1.2997543702  | 0.0306374449  |
| SI     | 0.0000000000  | -1.2997543738 | 0.0306374675  |
| SI     | -0.0000000000 | -0.0000000055 | 1.9072426539  |
| AL     | -0.0000000000 | 0.0000000092  | -2.1187735663 |
| 4      |               |               |               |
| Al2Si2 |               |               |               |
| SI     | -0.0000000000 | 1.4504977557  | -0.0375660065 |
| SI     | -0.0000000000 | -1.4504977414 | -0.0375659871 |
| AL     | 0.0000000000  | -0.0000000156 | 1.8963021479  |
| AL     | 0.0000000000  | 0.0000000014  | -1.9714261544 |
| 4      |               |               |               |
| Al3Si1 |               |               |               |
| AL     | 0.0000000000  | 1.4163280444  | -0.0350332730 |
| SI     | 0.0000000000  | -1.3026696760 | -0.0399002349 |
| AL     | -0.0000000000 | -0.0605178388 | 2.0118584941  |
| AL     | -0.0000000000 | -0.0531405296 | -2.0871809862 |
| 4      |               |               |               |
| Al4Si0 |               |               |               |
| AL     | 0.0642521279  | 1.4211274490  | -0.0872506691 |
| AL     | -0.0176771753 | -1.3820469211 | -0.1184455799 |
| AL     | -0.0022360693 | -0.1436079956 | 2.0720314281  |
| AL     | 0.0516011167  | 0.1825774677  | -2.2777051791 |
| 4      |               |               |               |
| Al0Si4 |               |               |               |
| SI     | -0.0000000000 | 1.2227510255  | -0.0375623763 |
| SI     | -0.0000000000 | -1.2227510171 | -0.0375623580 |
| SI     | 0.0000000000  | -0.0000000102 | 1.9569638264  |
| SI     | 0.0000000000  | 0.0000000017  | -2.0320950920 |
| 5      |               |               |               |
| Al1Si4 |               |               |               |
| SI     | -0.0121900931 | 1.5759255280  | 0.0369278814  |
| SI     | -0.0121141532 | -1.5759274027 | 0.0369946279  |
| SI     | -1.5229649200 | -0.0000545872 | -0.8527134479 |
| AL     | 1.5406982256  | 0.0000182683  | -0.8616946119 |
| SI     | 0.0065709405  | 0.0000381729  | 1.7901765606  |
| 5      |               |               |               |
| Al2Si3 |               |               |               |
| SI     | -0.0000000550 | 1.6136356528  | 0.1758483352  |
| SI     | -0.0000000397 | -1.6136031809 | 0.1762032014  |
| AL     | -1.5463744988 | -0.0001128932 | -0.9993323370 |

|    |              |               |               |
|----|--------------|---------------|---------------|
| SI | 0.0000000262 | 0.0001933317  | 1.7822921155  |
| AL | 1.5463745678 | -0.0001129119 | -0.9993323150 |

5  
Al3Si2

|    |               |               |               |
|----|---------------|---------------|---------------|
| AL | 1.5226325346  | 2.2406114769  | -0.1579338291 |
| SI | 0.0030344091  | -1.5291425687 | 0.1720009140  |
| AL | -2.6808594279 | -1.2438741441 | 0.1100714749  |
| SI | 1.8566995104  | -0.2753170910 | 0.0842542694  |
| AL | -0.7015070263 | 0.8077223070  | -0.0587018192 |

5  
Al5Si0

|    |               |               |               |
|----|---------------|---------------|---------------|
| AL | -0.4117418717 | -0.8723218015 | -1.6573187856 |
| AL | 1.5144443882  | 1.4530622878  | 0.0302408602  |
| AL | -0.8561274386 | 1.3913271213  | -0.7248226963 |
| AL | -1.6401597513 | -1.0016862270 | 0.7048993919  |
| AL | -0.1393841867 | 0.8103838793  | 2.0205466498  |

5  
Al0Si5

|    |               |               |               |
|----|---------------|---------------|---------------|
| SI | -0.0000000055 | 1.5072269452  | -0.8430572305 |
| SI | 0.0000000195  | -1.5072269420 | -0.8430570591 |
| SI | -1.5403469087 | 0.0000000841  | 0.0271330111  |
| SI | 0.0000000196  | -0.0000001468 | 1.7675272531  |
| SI | 1.5403468751  | 0.0000000595  | 0.0271330254  |

6  
Al1Si5

|    |               |               |               |
|----|---------------|---------------|---------------|
| SI | -0.0582995173 | -0.1476465274 | 1.4127279076  |
| SI | -2.0196175551 | 0.1003356244  | -0.0000001109 |
| SI | -0.1291375166 | 1.7703367953  | 0.0000001236  |
| SI | -0.0582994916 | -0.1476465130 | -1.4127278406 |
| AL | 0.3976466346  | -2.1295326470 | 0.0000000738  |
| SI | 1.9010444460  | 0.4007342677  | -0.0000001533 |

6  
Al2Si4

|    |               |               |               |
|----|---------------|---------------|---------------|
| SI | -0.0372228536 | -0.3343034588 | 1.4963387752  |
| AL | -1.8735191560 | 0.2968783399  | -0.0000000763 |
| SI | -0.1241790157 | 2.1069267473  | 0.0000001754  |
| SI | -0.0372228443 | -0.3343035744 | -1.4963388407 |
| AL | 0.5518224899  | -2.3741466610 | 0.0000000578  |
| SI | 1.5536583799  | 0.4855296070  | -0.0000000910 |

6  
Al3Si3

|    |               |               |               |
|----|---------------|---------------|---------------|
| SI | -0.0650526047 | -0.0321823205 | 1.5540302052  |
| AL | -2.0461888250 | -0.2207106735 | 0.0000000473  |
| AL | -0.0212347776 | 1.8930705002  | -0.0000000855 |
| SI | -0.0650526042 | -0.0321823563 | -1.5540302285 |
| AL | 0.3412968082  | -1.9150196326 | -0.0000000441 |
| SI | 1.8895690035  | 0.1536054827  | 0.0000001048  |

6  
Al4Si2

|    |               |               |               |
|----|---------------|---------------|---------------|
| AL | 0.0055655592  | -0.0255732623 | 1.9417489930  |
| SI | -1.6143041817 | -0.1811466711 | 0.0000000123  |
| AL | -0.1800952741 | 1.9072871645  | -0.0000000213 |
| AL | 0.0055655529  | -0.0255733075 | -1.9417489424 |
| AL | 0.1911871532  | -1.9584218353 | -0.0000000666 |
| SI | 1.6254181904  | 0.1300089117  | 0.0000000249  |

6  
Al5Si1

|    |               |               |               |
|----|---------------|---------------|---------------|
| AL | -0.0114983423 | -0.0262700216 | 1.8329217676  |
| AL | -1.9107692748 | -0.2242084266 | -0.0381435805 |
| AL | -0.1937991622 | 1.8913638350  | -0.0209392755 |
| SI | 0.0219437645  | -0.0250836516 | -1.7531390517 |
| AL | 0.2052380150  | -1.9422095855 | -0.0186183790 |
| AL | 1.9222219998  | 0.1729888503  | -0.0020814810 |

6  
Al6Si0

|    |               |               |               |
|----|---------------|---------------|---------------|
| AL | -0.6951053082 | -0.8823121128 | 1.9534338397  |
| AL | -2.0066400712 | 0.4303520992  | 0.1162910498  |
| AL | 0.0194633748  | 2.1306885914  | -0.3153245625 |
| AL | -0.2443434879 | -0.3260635743 | -1.5456416964 |
| AL | 0.8423130897  | -1.9118019197 | 0.1109745302  |
| AL | 2.1176494028  | 0.4057179164  | -0.3197331612 |

6  
Al0Si6

|    |               |               |              |
|----|---------------|---------------|--------------|
| SI | -0.6925494483 | -1.4174090033 | 1.1936323532 |
|----|---------------|---------------|--------------|

|    |               |               |               |
|----|---------------|---------------|---------------|
| SI | -1.4211409578 | 1.1890484388  | 0.5818120701  |
| SI | 0.7035844775  | 1.3662231350  | -1.1936851180 |
| SI | -0.7964604095 | -0.4859097241 | -1.0057642134 |
| SI | 1.4323366016  | -1.2401130886 | -0.5817818366 |
| SI | 0.8075667364  | 0.4347412422  | 1.0057867482  |

7  
Al1Si6

|    |               |               |               |
|----|---------------|---------------|---------------|
| SI | 0.0000000264  | 2.0554723139  | 0.6827284603  |
| SI | 0.0000000095  | 1.3100333620  | -1.6775109452 |
| SI | -0.0000000005 | -1.3100333753 | -1.6775109094 |
| SI | 0.0000000291  | -2.0554723085 | 0.6827284782  |
| SI | -1.3022977602 | 0.0000000264  | -0.0199918709 |
| AL | -0.0000000348 | -0.0000000500 | 2.1849826967  |
| SI | 1.3022977304  | 0.0000000315  | -0.0199919097 |

7  
Al2Si5

|    |               |               |               |
|----|---------------|---------------|---------------|
| AL | 0.0000000984  | 2.2922617530  | 0.9484739658  |
| SI | 0.0000000533  | 1.7255516860  | -1.4619045812 |
| SI | -0.0000000245 | -1.7255516938 | -1.4619045950 |
| AL | 0.0000001416  | -2.2922617084 | 0.9484739392  |
| SI | -1.2934149489 | -0.0000000360 | -0.2945381521 |
| SI | -0.0000001228 | 0.0000000122  | 1.7713714522  |
| SI | 1.2934148009  | -0.0000000130 | -0.2945380288 |

7  
Al3Si4

|    |               |               |               |
|----|---------------|---------------|---------------|
| AL | -0.0000009440 | 2.4733150642  | 0.8422893745  |
| SI | 0.0000001640  | 1.5289841607  | -1.4728265135 |
| SI | 0.0000000740  | -1.5315190692 | -1.4698251530 |
| AL | -0.0000007905 | -2.4719172081 | 0.8481672988  |
| SI | -1.3701768616 | -0.0002391596 | -0.2202599562 |
| AL | 0.0000005630  | 0.0016153934  | 1.8481492519  |
| SI | 1.3701777944  | -0.0002391817 | -0.2202603024 |

7  
Al4Si3

|    |               |               |               |
|----|---------------|---------------|---------------|
| AL | -0.3549039539 | 1.5663123072  | 0.8626542388  |
| AL | 0.3125264573  | 1.5151506126  | -2.0218308355 |
| AL | 0.0613568425  | -1.3380055002 | -1.6856084230 |
| SI | -0.2798293864 | -1.5192896584 | 0.8862788790  |
| AL | -1.8718993273 | -0.0780698893 | -0.3511921714 |
| SI | 0.7554921781  | -0.1632954776 | 2.4711823658  |
| SI | 1.3772571895  | 0.0171976059  | -0.0060500538 |

7  
Al5Si2

|    |               |               |               |
|----|---------------|---------------|---------------|
| AL | 0.8359671098  | 2.3820631486  | 0.8938942553  |
| AL | -0.3597905246 | 1.3025878213  | -1.2792473712 |
| SI | 0.2766594839  | -1.2072556382 | -1.7472633489 |
| AL | 0.1977350400  | -2.2012002496 | 0.8189587402  |
| AL | -1.8476611947 | -0.5135577365 | -0.2953346934 |
| AL | -0.4636092363 | 0.2861257576  | 1.7653488577  |
| SI | 1.3606993218  | -0.0487631034 | -0.0009224397 |

7  
Al6Si1

|    |               |               |               |
|----|---------------|---------------|---------------|
| AL | 1.2442851826  | 2.4927445761  | 0.7951883366  |
| AL | -0.4119169403 | 1.2438628576  | -1.0971267985 |
| AL | 0.1432501690  | -1.2239193638 | -1.6789621607 |
| AL | -0.0491569397 | -2.0497297173 | 0.8787571892  |
| AL | -2.0939304161 | -0.6687647055 | -0.2833481730 |
| SI | -0.4751780083 | 0.4007431711  | 1.3413218809  |
| AL | 1.7143569528  | -0.1915368181 | 0.1109397254  |

7  
Al7Si0

|    |               |               |               |
|----|---------------|---------------|---------------|
| AL | -0.8197566970 | 1.9271279076  | 0.9184022851  |
| AL | 0.3680000521  | 1.3230742007  | -1.3519791202 |
| AL | 0.0520336754  | -1.3907827041 | -1.8967554032 |
| AL | -0.3531197209 | -1.7271057683 | 0.8388866339  |
| AL | -1.8961419410 | -0.0866325534 | -0.3917139001 |
| AL | 0.7376694171  | 0.2715387756  | 2.1601474348  |
| AL | 1.9113152148  | -0.3172198581 | -0.1215539303 |

7  
Al0Si7

|    |               |               |               |
|----|---------------|---------------|---------------|
| SI | 0.0000000379  | 2.0379780620  | 0.6844459570  |
| SI | -0.0000000841 | 1.2595404036  | -1.7114178699 |
| SI | 0.0000000873  | -1.2595403703 | -1.7114178899 |
| SI | -0.0000000762 | -2.0379780735 | 0.6844459676  |



|    |               |               |              |
|----|---------------|---------------|--------------|
| SI | -1.2773728980 | -0.0000000335 | 0.0221612666 |
| SI | 0.0000000341  | 0.0000000323  | 2.165052683  |
| SI | 1.2773728991  | -0.0000000205 | 0.0221613003 |

8

Al1Si7

|    |               |               |               |
|----|---------------|---------------|---------------|
| SI | -0.1006291220 | -2.4952095329 | -0.0000007441 |
| SI | -0.0112217747 | -0.4635324029 | 1.3029209165  |
| SI | 1.3728439924  | 1.1914709559  | 0.0000011497  |
| SI | 2.0728490989  | -1.0994727766 | 0.0000000051  |
| SI | -0.0112218021 | -0.4635310838 | -1.3029203532 |
| AL | -2.3989769406 | -1.0649474285 | -0.0000000797 |
| SI | -1.1830889054 | 1.2565965802  | 0.0000012050  |
| SI | 0.1604934535  | 3.2392846885  | -0.0000021006 |

8

Al2Si6

|    |               |               |               |
|----|---------------|---------------|---------------|
| SI | -0.1310638786 | -2.3766717578 | 0.0521837921  |
| AL | -0.0123763691 | 0.0098847306  | 1.3244193529  |
| SI | 1.4485221807  | 1.1155580181  | -0.5062186351 |
| AL | 2.2159992610  | -1.2310037147 | 0.1120151399  |
| SI | -0.0878279490 | -0.4829625394 | -1.3993795841 |
| SI | -2.1377191544 | -0.8709307164 | 0.1881156613  |
| SI | -1.4619712071 | 1.3053211370  | -0.5134497649 |
| SI | 0.0674851165  | 2.6314638427  | 0.7423140380  |

8

Al3Si5

|    |               |               |               |
|----|---------------|---------------|---------------|
| AL | -0.0900426513 | -2.5996405639 | -0.1212712330 |
| SI | -0.3249278094 | -0.1484079685 | 1.3746960955  |
| AL | 2.6831432156  | 1.4068936793  | -0.5154604214 |
| SI | 1.7159242670  | -0.9821804239 | 0.3132936774  |
| SI | -0.0177000061 | 0.0092578723  | -1.1293095892 |
| SI | -2.0499180743 | -1.0416506887 | -0.1103496273 |
| AL | -2.1893897453 | 1.4581241227  | -0.1233777963 |
| SI | 0.1739588039  | 1.9982629708  | 0.3117788934  |

8

Al4Si4

|    |               |               |               |
|----|---------------|---------------|---------------|
| SI | -1.2689736256 | -1.7217767926 | 0.0805081733  |
| AL | -0.0288251659 | -0.0095072866 | 1.5782878152  |
| SI | 2.0925358785  | -0.2123195495 | 0.1045902528  |
| AL | 1.0675125489  | -2.4219862853 | -0.2425379992 |
| SI | -0.0197574797 | 0.0145652107  | -1.2013699540 |
| AL | 1.5346096094  | 2.1644070631  | -0.2014090878 |
| SI | -0.8956183969 | 1.9440065304  | 0.1134651106  |
| AL | -2.6710303687 | 0.2758621098  | -0.2315343109 |

8

Al5Si3

|    |               |               |               |
|----|---------------|---------------|---------------|
| SI | -0.1138555453 | -2.4573886935 | -0.0000009107 |
| SI | -0.0397123463 | -0.4305028461 | 1.3419161457  |
| AL | 1.4703604920  | 1.1261808848  | 0.0000015710  |
| AL | 2.1633457181  | -1.3560803276 | -0.0000000850 |
| SI | -0.0397121501 | -0.4305010630 | -1.3419155389 |
| AL | -2.2145578658 | -1.0849548632 | -0.0000003508 |
| AL | -1.4689906710 | 1.3068881330  | 0.0000018267  |
| AL | 0.1441703683  | 3.4270177757  | -0.0000026593 |

8

Al6Si2

|    |               |               |               |
|----|---------------|---------------|---------------|
| SI | -0.2438461887 | -2.4408041838 | -0.2729804024 |
| AL | -0.2900087787 | -0.0160635666 | 1.6560038219  |
| AL | 2.1960739883  | 1.3289573049  | -0.6567735688 |
| AL | 1.7702478559  | -1.0295375996 | 0.3583221282  |
| AL | 0.0849923160  | -0.2429335157 | -1.6567049467 |
| SI | -2.1310906892 | -1.2477159784 | 0.2609281776  |
| AL | -1.7161826898 | 1.1798422561  | -0.3576835239 |
| AL | 0.2308621860  | 2.5689142830  | 0.6688883070  |

8

Al7Si1

|    |               |               |               |
|----|---------------|---------------|---------------|
| AL | -0.1541113026 | -2.9697563223 | 0.1613641983  |
| AL | -0.0635581409 | -0.3744484573 | 1.6231585829  |
| AL | 1.7109914470  | 1.2785141672  | 0.5963207869  |
| AL | 1.7439209726  | -1.2662450237 | -0.3491923649 |
| SI | 0.0259646730  | 0.2284116018  | -1.3964687747 |
| AL | -1.8640952524 | -1.0991981090 | -0.4229658001 |
| AL | -1.6337808212 | 1.4335620524  | 0.5275303086  |
| AL | 0.1357164244  | 2.8698190909  | -0.7397469369 |

8

Al8Si0  
AL 0.0594778366 -2.6272044626 -0.5732118431  
AL 0.2786344299 0.2603359464 1.8324184982  
AL 1.6340856672 0.7895102376 -0.4352409460  
AL 1.9908813637 -1.6056912692 0.8197099101  
AL -0.3034283923 -0.2351164944 -1.8324253136  
AL -1.6587984547 -0.7644351283 0.4352600963  
AL -2.0156658366 1.6308511539 -0.8196060739  
AL -0.0841386139 2.6524090168 0.5730956677

8

Al0Si8  
SI -0.1252032804 -2.5516300812 -0.0003054216  
SI -0.0357058827 -0.5178583178 1.3817144630  
SI 1.2478777208 1.2285105439 0.0004546553  
SI 1.9715445148 -1.1695343236 -0.0000197234  
SI -0.0356810789 -0.5172944302 -1.3814746014  
SI -2.0924431756 -0.9906979843 -0.0000197700  
SI -1.1609484223 1.3345106008 0.0004547735  
SI 0.1316076044 3.2846529921 -0.0008043744

9

Al1Si8  
AL 1.5779843940 -1.2625177299 -0.0000003770  
SI -0.0393994894 -1.4357960157 1.8336418010  
SI -0.0394013577 -1.4357966353 -1.8336425269  
SI -1.4648862835 -1.9646302064 0.0000009104  
SI 1.7641893876 1.2829393223 0.0000008536  
SI 0.1445288383 1.0103005874 1.7718687679  
SI -0.5967278561 2.5093979803 -0.0000003258  
SI 0.1445304753 1.0103009433 -1.7718692567  
SI -1.6440771084 0.3340617540 0.0000001541

9

Al2Si7  
SI 1.3035900471 -1.3570934924 -0.0027035380  
AL -0.1240350429 -1.4577640300 2.0476686349  
SI -0.0940721490 -1.2696821252 -1.8951328624  
SI -1.2846920114 -2.2121968646 -0.0806489767  
SI 1.7087326664 1.1772563584 -0.0245066570  
SI 0.1860335855 1.2176924048 1.8056631039  
SI -0.6064637957 2.5760469910 -0.0417396138  
SI 0.1540986879 1.1869929684 -1.8394653930  
AL -1.3964509879 0.1870077895 0.0308653019

9

Al3Si6  
SI 2.2535763434 -0.8995993157 -0.8137547128  
AL 0.8849138026 -1.6364043156 1.4529349739  
SI 0.1056046891 -2.0311307385 -0.9983068557  
AL -1.6105945875 -0.5055323336 0.0905898865  
AL 1.0781651413 0.9307818358 0.3121039466  
SI -0.6973739620 0.2309709124 2.2605054854  
SI -0.8136857351 2.2645513819 0.9477778776  
SI 0.2389821447 0.1558445104 -2.0621321331  
SI -1.5928468365 1.5387780628 -1.1897184684

9

Al4Si5  
AL 2.1444041828 -1.6629361638 -0.2911275615  
SI 0.8747263303 -1.2974163604 1.8588805978  
SI 0.2775650903 -0.8288968949 -1.8212553932  
SI -0.8107377183 -1.6699115497 0.1852857338  
AL 0.6752153576 0.7189554519 0.3235859661  
AL -1.0647321333 0.1696846088 2.5328395941  
AL 0.7190876821 2.9852454904 -1.0975528821  
SI -0.9861977785 1.1716862630 -1.8582727690  
SI -1.9825900130 0.4618491549 0.1676167138

9

Al5Si4  
SI 1.0343525195 -1.0016992053 -0.0211869677  
SI -0.5525247304 -1.5332663467 1.8723913822  
SI -0.8621483553 -0.6181562454 -1.7353842619  
AL -1.2348309521 -2.5511719254 -0.2629536863  
AL 1.3492570469 1.7573456996 0.4932889992  
AL 1.2606363790 0.0999063020 2.4914474682  
AL -1.0415583525 2.4427808285 -1.5903927431  
SI 1.0383964199 0.8299260636 -1.7730628665  
AL -1.1448389750 0.6225948293 0.5258526759

9  
Al6Si3  
AL 1.1809107483 -0.9180809939 0.0000000259  
AL -0.4754300141 -1.5350588073 2.3463414840  
AL -0.4754303502 -1.5350585794 -2.3463414032  
SI -0.9270901832 -2.3135057323 0.0000000862  
AL 1.8787833723 1.6913402040 0.0000000921  
SI 0.3515943048 0.7572193513 1.7970541754  
AL -0.6253742181 2.9138444216 -0.0000000741  
SI 0.3515946003 0.7572193273 -1.7970542484  
AL -1.4128172599 0.2303408088 -0.0000001368

9  
Al7Si2  
AL 1.1859056746 -0.7227526518 0.0013106684  
AL -0.6464492862 -1.4047809319 2.2701246230  
AL -0.6122434631 -1.3964270667 -2.3443847738  
AL -0.9095222080 -2.6271471517 -0.0440494815  
AL 2.0644148277 1.7531434150 -0.1344524450  
AL 0.2951846181 1.0008140141 2.1143134839  
AL -0.4743366965 2.4678584479 0.0729961595  
SI 0.1626764613 0.9377321096 -1.9192092298  
SI -1.2188889279 0.0398198156 -0.0166490046

9  
Al8Si1  
AL 1.5697990954 -0.4267972809 -0.1255072544  
AL -1.6409581323 -1.5151769554 2.3056173982  
AL 0.2430782430 -2.2110866041 -2.2998967067  
SI -0.6537626929 -1.7404106530 0.0028713068  
AL 1.5076258190 2.1159140539 -1.0967358787  
AL 0.3160037903 0.1786555104 2.1091936760  
AL 0.1777431576 2.6046932958 1.0871946657  
AL -0.1629844864 0.3456439303 -2.1089009545  
AL -1.5098037937 0.6968247029 0.1261637444

9  
Al9Si0  
AL 2.0785385295 -0.8431167315 -0.0105392579  
AL 0.3166248868 -2.2777911647 1.2896470610  
AL 0.3201180121 -2.3812437339 -1.4866999507  
AL -1.7884601684 -1.3992584010 0.0050049954  
AL 1.7934202082 1.8933561335 0.1027722769  
AL -0.0615817276 0.3582506475 1.5274947348  
AL -0.4600233296 3.0795665705 -0.1528954489  
AL -0.0666062385 0.3118985219 -1.3934674595  
AL -2.2852891726 1.3065981579 0.1186830489

9  
Al0Si9  
SI 1.4528649277 -1.1366732358 -0.0000000599  
SI 0.2256574988 -1.6941143596 1.9416934728  
SI 0.2256574890 -1.6941144173 -1.9416935457  
SI -1.1085806644 -1.5023539393 -0.0000000107  
SI 1.7962877853 1.4236373236 0.0000001606  
SI -0.1084948700 0.6452166433 1.5229816938  
SI -0.3733450314 2.5018380415 -0.0000001223  
SI -0.1084948511 0.6452165681 -1.5229817089  
SI -2.1548112839 0.8596073753 0.0000001203

10  
Al1Si9  
SI 0.6953765661 -1.6854714598 1.3399532081  
SI 1.0868080161 0.9805991819 1.6933661096  
SI 0.6953766522 -1.6854714254 -1.3399532288  
AL -1.4957955817 -1.6015954415 -0.0000000580  
SI -1.0394643998 0.0181664225 -1.9707666311  
SI -1.0394643220 0.0181663540 1.9707666830  
SI 0.0039759331 2.2377193338 -0.0000000625  
SI 1.0868080459 0.9805990791 -1.6933661440  
SI -2.0048523097 1.0106005462 0.0000000642  
SI 2.1890213999 -0.3001325907 0.0000000592

10  
Al2Si8  
SI 0.0511401628 -1.7743579651 1.7235619244  
SI 1.6143861861 1.1150509337 0.8855106755  
SI 0.9490632272 -1.2160468519 -1.4976907056  
SI -1.1262637036 -1.7731245000 -0.3735109573  
AL -1.2829035677 -0.3007138147 -2.5487644402

|    |               |               |               |
|----|---------------|---------------|---------------|
| SI | -0.4609000668 | 0.5580222237  | 2.0097773801  |
| AL | -0.4038820139 | 2.7792480145  | 0.6000928153  |
| SI | 0.4547902201  | 1.1963551972  | -1.2948042226 |
| SI | -1.6840107756 | 0.6222127711  | -0.1361182286 |
| SI | 2.0663703314  | -1.2334660085 | 0.6319457593  |

10

Al3Si7

|    |               |               |               |
|----|---------------|---------------|---------------|
| AL | 0.8301116791  | 2.7471037630  | 0.0907241787  |
| SI | 1.6279589979  | 0.2493681227  | -0.5888068553 |
| AL | 0.6920444037  | 0.8395295113  | 1.8805984322  |
| SI | -1.4451313440 | 1.1187551444  | 0.2548096289  |
| SI | -1.4622382954 | -0.4395226640 | 2.1775669823  |
| SI | -0.1340118308 | 1.4234710914  | -1.8209271437 |
| SI | 1.6048242860  | -2.0115662344 | -1.1422746201 |
| SI | -0.3619850433 | -0.9777601355 | -1.9083243878 |
| SI | -1.9160657614 | -1.2768702207 | -0.0023507882 |
| AL | 0.4605389083  | -1.7861333782 | 1.0589845731  |

10

Al4Si6

|    |               |               |               |
|----|---------------|---------------|---------------|
| SI | 0.3696200690  | 2.0921653438  | 0.1865342321  |
| SI | 2.3430911784  | -0.0298345281 | -0.3281049902 |
| AL | 2.0526761202  | 1.1535691209  | 1.8399649330  |
| SI | -1.8808082208 | 1.0185467497  | 0.2122737304  |
| AL | -2.1792487217 | -0.8653873435 | 1.8883534474  |
| SI | 0.8903422635  | 1.0320061186  | -1.8661948457 |
| AL | 0.9738468125  | -2.0981417149 | -0.9920137858 |
| SI | -1.4224510602 | -0.0714501271 | -1.8396934572 |
| SI | -1.4825115949 | -1.8549943770 | -0.2843365049 |
| AL | 0.2314891539  | -0.4901042424 | 1.1832172408  |

10

Al5Si5

|    |               |               |               |
|----|---------------|---------------|---------------|
| AL | -0.2407304118 | -1.5230112767 | 2.0486673666  |
| SI | 0.9477069921  | 0.8424173134  | 1.7889328454  |
| SI | 1.0297586499  | -0.3994173648 | -1.6675800143 |
| SI | -0.4423778656 | -2.0616529023 | -0.4317458895 |
| SI | -1.3510607457 | -0.7376961239 | -2.1450643952 |
| SI | -1.3562666158 | 0.6470800447  | 2.5101340122  |
| AL | 1.2063201547  | 2.0795355454  | -0.3990015568 |
| AL | -0.4888479979 | 1.6253542565  | -2.3663495824 |
| AL | -1.1234872794 | 0.6072185200  | 0.0473730657  |
| AL | 1.9967751194  | -1.1066480123 | 0.6146341485  |

10

Al6Si4

|    |               |               |               |
|----|---------------|---------------|---------------|
| AL | 0.9766294866  | -2.9262745954 | 0.3138360052  |
| AL | 1.0901939730  | 1.1476913366  | 1.7693868543  |
| SI | 0.8554667545  | -1.5073552626 | -1.7900836094 |
| AL | -0.5448518356 | -0.8452842040 | 0.6145500485  |
| AL | -1.1937576936 | 0.0053347776  | -2.1005162738 |
| AL | -1.5009234710 | 1.1559576021  | 2.1877452867  |
| SI | -0.5744351574 | 2.0563286979  | -0.1381306934 |
| AL | 1.3306566024  | 0.8642335143  | -1.2053276546 |
| SI | -2.5320291981 | 0.6888396026  | -0.0797327878 |
| SI | 2.2708405392  | -0.6662914689 | 0.4282728241  |

10

Al7Si3

|    |               |               |               |
|----|---------------|---------------|---------------|
| AL | 0.7419733398  | -2.3796808247 | 1.2894291288  |
| AL | 1.8461607670  | 1.5455068569  | 1.6016076447  |
| AL | 0.6895741083  | -1.6743853368 | -1.4049542026 |
| SI | -1.5970995656 | -2.2384504632 | 0.3872023145  |
| AL | -1.7045135723 | -0.5055084027 | -1.6772989379 |
| AL | -0.5348842618 | 0.0288896346  | 0.9536984125  |
| SI | -0.1340404513 | 2.6478253797  | 0.6638561350  |
| AL | 0.6300758588  | 0.9961879896  | -1.1800147287 |
| AL | -1.9266327576 | 1.9933713491  | -0.9197112144 |
| SI | 2.1671765347  | -0.4405761826 | 0.2861854482  |

10

Al8Si2

|    |               |               |               |
|----|---------------|---------------|---------------|
| AL | 1.4802287721  | -2.1136649537 | 1.4970171373  |
| AL | 0.3577930849  | 0.4173212855  | 0.9670813779  |
| AL | 0.6254375103  | -1.6545950609 | -1.5474944178 |
| AL | -0.9992561809 | -2.0327936048 | 0.4323022955  |
| AL | -1.2938635797 | 0.2824297449  | -1.1330550990 |
| SI | -2.4099429477 | -0.1547709555 | 1.0890309557  |
| SI | -0.1403347654 | 2.5125337343  | -0.8670735830 |

|    |               |               |               |
|----|---------------|---------------|---------------|
| AL | 1.4177726656  | 0.8078553478  | -1.6510155624 |
| AL | -1.8181837016 | 2.2858521387  | 0.9903436079  |
| AL | 2.9581391425  | -0.3769876762 | 0.2228632879  |

10

Al10Si0

|    |               |               |               |
|----|---------------|---------------|---------------|
| AL | 0.4798368078  | -1.7535829593 | 1.1700920314  |
| AL | 0.7075950919  | 0.9523814171  | 1.0131581581  |
| AL | 0.9525541526  | -1.6798343476 | -1.4470192723 |
| AL | -1.8655307820 | -2.7271713851 | -0.0167540570 |
| AL | -0.8387277695 | 0.0819966757  | -0.8895200284 |
| AL | -1.7592851108 | -0.5405855221 | 1.7503353161  |
| AL | 0.0596296395  | 2.9895177177  | -0.7792285339 |
| AL | 1.6632966895  | 1.1161920339  | -1.7791099335 |
| AL | -1.9253467709 | 1.9995896771  | 0.8877523141  |
| AL | 2.7037680520  | -0.4653233075 | 0.0902940054  |

10

Al0Si10

|    |               |               |               |
|----|---------------|---------------|---------------|
| SI | 0.0186330039  | 2.2318643395  | 0.0000000201  |
| SI | 2.1836116150  | -0.1339076174 | -0.0000000544 |
| SI | 0.9977361373  | 0.9667732654  | 1.7326952327  |
| SI | -1.9957804964 | 1.0064542374  | -0.0000000072 |
| SI | -1.1118993829 | -0.1021597963 | 1.8996333171  |
| SI | 0.9977361067  | 0.9667733235  | -1.7326952451 |
| SI | 0.7077584986  | -1.6566970226 | -1.2733142816 |
| SI | -1.1118993532 | -0.1021598288 | -1.8996333547 |
| SI | -1.4976085415 | -1.6338688327 | 0.0000000460  |
| SI | 0.7077584125  | -1.6566970680 | 1.2733143270  |

11

Al1Si10

|    |               |               |               |
|----|---------------|---------------|---------------|
| SI | -1.5442219195 | -1.4610148891 | 0.1142404521  |
| SI | -1.2880164757 | 0.2909312517  | 1.7742853367  |
| SI | 1.0000013437  | -1.2633519848 | -1.3632236728 |
| SI | 0.7046739001  | -1.0985813842 | 1.0929017129  |
| SI | -1.1092795912 | -0.1381134437 | -1.9025901148 |
| AL | 1.1432494137  | 1.1642563636  | 2.1519083665  |
| SI | 0.6137273132  | 1.5363251187  | -1.7928223888 |
| SI | 0.2748610333  | -3.2103589636 | 0.0706500737  |
| SI | 2.1075507496  | 0.5553010609  | -0.1972284545 |
| SI | -2.0509919411 | 1.3296348028  | -0.2455151283 |
| SI | -0.0331348263 | 2.4513430678  | 0.2973938174  |

11

Al2Si9

|    |               |               |               |
|----|---------------|---------------|---------------|
| SI | -1.1145369806 | -1.8061663650 | 0.2525607050  |
| SI | -1.4464316480 | 0.4325331075  | 1.2976747795  |
| AL | -0.1223288580 | -1.8071350452 | -2.0715223670 |
| SI | 0.4566701737  | -1.5242458859 | 2.0000954879  |
| SI | -1.3703970813 | 0.2892238700  | -1.1671479810 |
| SI | 0.8713609182  | 0.8153239323  | 1.8255235416  |
| SI | 1.0935580998  | 0.3904944488  | -1.7918083687 |
| SI | 1.5154784625  | -1.6741878816 | -0.1616270822 |
| SI | 2.4977458804  | 0.5129827737  | 0.1101377430  |
| AL | -2.6739174153 | 2.5480368619  | -0.1537442614 |
| SI | 0.1112174485  | 1.9795111835  | -0.1401421965 |

11

Al3Si8

|    |               |               |               |
|----|---------------|---------------|---------------|
| SI | -1.9261322502 | -2.1155692686 | 0.2574974745  |
| SI | -1.5978437571 | -0.1159981235 | 1.4135858259  |
| AL | 1.1034591681  | -1.0809283989 | -2.3077964895 |
| SI | 1.3528397978  | -1.0426849110 | 1.9191411469  |
| SI | -1.3856863124 | -0.4469891339 | -1.2912055060 |
| SI | 0.3330075610  | 1.0853426162  | 1.8714314635  |
| SI | 0.3101674866  | 1.1958985141  | -1.7250366606 |
| SI | 0.4499752823  | -2.0043284086 | -0.0504893610 |
| SI | 1.9704087910  | 0.0741714042  | -0.0985997952 |
| AL | -1.7507952138 | 1.8713639476  | -0.1137551472 |
| AL | 0.9590184467  | 2.7360927623  | 0.1252270487  |

11

Al4Si7

|    |               |               |               |
|----|---------------|---------------|---------------|
| SI | -1.6098385139 | -1.1818279322 | 0.0000001947  |
| AL | -1.1962618447 | 0.2938782919  | 2.0665156001  |
| SI | -0.1256693189 | 1.5409297264  | 0.0000000850  |
| SI | 0.9730297460  | -1.1793181722 | -1.4658658732 |
| SI | 0.9730295341  | -1.1793182032 | 1.4658658171  |
| AL | -1.1962617618 | 0.2938778906  | -2.0665156177 |

|    |               |               |               |
|----|---------------|---------------|---------------|
| SI | 1.1627048856  | 1.1837279891  | 2.0306975103  |
| AL | -2.6534180655 | 1.1872009585  | -0.0000001368 |
| AL | 2.4671550076  | 0.3888757615  | -0.0000000231 |
| SI | 1.1627046187  | 1.1837281819  | -2.0306974561 |
| SI | 0.0949527127  | -2.7870644923 | -0.0000001018 |

11

Al5Si6

|    |               |               |               |
|----|---------------|---------------|---------------|
| SI | -1.8228561775 | -1.6365533070 | -0.1877435200 |
| AL | -1.6756436981 | -0.4118456888 | 1.9759722812  |
| SI | 1.6875955564  | -0.9382346604 | -1.4861791753 |
| AL | 0.9948775299  | -1.3221107080 | 2.0110927233  |
| SI | -1.9168052388 | 0.2987321611  | -1.5248490018 |
| SI | 0.3320816050  | 1.0822699418  | 1.5114601025  |
| SI | 0.2527749709  | 0.7244996731  | -2.3335145717 |
| SI | 0.4045955536  | -2.3975440170 | -0.1569601665 |
| AL | 2.5336706432  | 0.4280206624  | 0.4170305201  |
| AL | -1.7862619546 | 1.9080703210  | 0.3722740427  |
| AL | 0.8143902103  | 2.4210666218  | -0.5985832345 |

11

Al6Si5

|    |               |               |               |
|----|---------------|---------------|---------------|
| SI | -1.1511277273 | -1.0969783409 | -0.0801122610 |
| AL | -1.7222107035 | 0.4810518781  | 2.0578763764  |
| SI | -0.0909866363 | 2.2200181470  | 0.9361597519  |
| AL | 0.6355039814  | -1.4138357243 | -2.0570353584 |
| SI | 0.2911939633  | -0.9888140230 | 2.1580897611  |
| AL | -1.5694612996 | -0.1223647560 | -2.4747574330 |
| SI | 1.7191068092  | 0.7945763318  | 1.4621625964  |
| AL | -2.0839097250 | 1.3938427083  | -0.4397366419 |
| SI | 2.3630752455  | -0.3118764950 | -0.5241805551 |
| AL | 0.5122552945  | 1.2692963971  | -1.3897730287 |
| AL | 1.1486877979  | -2.4802261232 | 0.3513067923  |

11

Al7Si4

|    |               |               |               |
|----|---------------|---------------|---------------|
| SI | -0.4222232644 | -0.4200481982 | 0.0002397547  |
| AL | -1.3947717312 | 0.6774050998  | 2.2148610592  |
| AL | 0.5428835767  | -1.3559706615 | -2.2599455655 |
| AL | 0.5478666328  | -1.3581075285 | 2.2574104323  |
| AL | -1.3996601889 | 0.6794989789  | -2.2111936289 |
| SI | 1.0919458000  | 1.1389760276  | 1.5367484612  |
| SI | 1.0885605438  | 1.1404242232  | -1.5381237691 |
| AL | 0.7786268738  | -2.7415511394 | -0.0021777813 |
| AL | 2.2806588631  | -0.5376088132 | -0.0027880237 |
| SI | -2.6384426120 | 0.5634075054  | 0.0031500093  |
| AL | -0.6570254937 | 2.3699455060  | 0.0018190482  |

11

Al8Si3

|    |               |               |               |
|----|---------------|---------------|---------------|
| AL | -2.3809776696 | -1.1704220321 | -0.1186482314 |
| AL | -1.0530871275 | -0.9455456378 | 2.2483915723  |
| AL | 0.0237413774  | 2.6623043207  | -0.2652714519 |
| AL | -0.2027077992 | -1.5542525757 | -2.0637372062 |
| AL | 1.7693102540  | -1.2208647238 | 1.4483064916  |
| AL | -0.0945242286 | 0.0292591183  | 0.0511722288  |
| AL | 0.4841680649  | 1.4454182419  | 2.1437875327  |
| AL | -1.6802138247 | 1.0788339571  | -1.7106070779 |
| SI | 2.2089230791  | 1.0590792703  | 0.0544458191  |
| SI | 1.0250378706  | 0.8594500222  | -2.0522948756 |
| SI | -0.0475429965 | -2.4985699610 | 0.2644551982  |

11

Al9Si2

|    |               |               |               |
|----|---------------|---------------|---------------|
| SI | -1.2488884812 | -1.4789222755 | 0.0019362060  |
| AL | -1.5697631037 | -0.0152878103 | 2.0436267790  |
| SI | 1.1506417606  | 2.5327929845  | -0.0023657211 |
| AL | 0.7038135383  | -1.5112978165 | -2.2676775134 |
| AL | 0.7083037545  | -1.5090950809 | 2.2677309973  |
| AL | -1.5737910859 | -0.0172509745 | -2.0405240493 |
| AL | 0.5947163134  | 1.4266720078  | 2.2485896851  |
| AL | -1.3828213150 | 1.7127771264  | 0.0005333077  |
| AL | 0.8373948968  | -0.0226865803 | -0.0008219910 |
| AL | 0.5902922625  | 1.4244878486  | -2.2511469604 |
| AL | 1.2422284597  | -2.7974994293 | 0.0001192354  |

11

Al10Si1

|    |               |               |              |
|----|---------------|---------------|--------------|
| SI | -0.0092712289 | -0.0174807358 | 0.0319120995 |
| AL | -1.2270724519 | 1.1014751794  | 2.1770873612 |

|    |               |               |               |
|----|---------------|---------------|---------------|
| AL | 0.2705344408  | 2.5791433366  | 0.3140393014  |
| AL | 1.2098114469  | -1.1371341327 | -2.1145762311 |
| AL | -0.1735343419 | -1.5038579920 | 2.1914827333  |
| AL | -1.4175875030 | -0.8561776693 | -2.1252306082 |
| AL | 1.4004835461  | 0.8215299726  | 2.1899540703  |
| AL | -2.6169657792 | 0.2593957798  | 0.0211177192  |
| AL | 2.5970246611  | -0.2943523529 | 0.0425265617  |
| AL | 0.1602928545  | 1.4683172849  | -2.1275411901 |
| AL | -0.2837756444 | -2.6145686704 | -0.2501918170 |

11

Al11Si0

|    |               |               |               |
|----|---------------|---------------|---------------|
| AL | -0.6542443174 | -0.6733274890 | -0.0000008795 |
| AL | -1.4690326979 | 0.5819140578  | 2.2997722806  |
| AL | -0.1093327995 | 2.0034424532  | 0.0000015382  |
| AL | 0.5901282487  | -1.5049331503 | -2.2996934739 |
| AL | 0.5901255380  | -1.5049358666 | 2.2996922631  |
| AL | -1.4690299162 | 0.5819158432  | -2.2997739434 |
| AL | 1.1174040844  | 1.0746579509  | 2.2479376329  |
| AL | -2.8236373025 | 1.1432885280  | -0.0000017110 |
| AL | 2.0294795802  | -0.1647777661 | 0.0000018378  |
| AL | 1.1174069697  | 1.0746604165  | -2.2479341419 |
| AL | 1.1328596125  | -2.8672149776 | -0.0000014256 |

11

Al0Si11

|    |               |               |               |
|----|---------------|---------------|---------------|
| SI | -1.4708862423 | -1.8598811333 | 0.0479107930  |
| SI | -1.3952096898 | 0.2019841272  | 1.3253203132  |
| SI | 0.7647203460  | -1.1895380213 | -1.2453649339 |
| SI | 0.8034836672  | -1.1607435279 | 1.2552067491  |
| SI | -1.4362239239 | 0.1713422089  | -1.2783945715 |
| SI | 0.8086910177  | 1.1443377131  | 2.0650209051  |
| SI | 0.7428810395  | 1.0963556524  | -2.1086979184 |
| SI | 0.5639640557  | -3.2674155145 | 0.0320257074  |
| SI | 2.0002229742  | 0.5883213495  | -0.0349338518 |
| SI | -2.2817721130 | 1.9452780829  | 0.0164883883  |
| SI | 0.1523088688  | 2.3475290629  | -0.0263415806 |

12

Al1Si11

|    |               |               |               |
|----|---------------|---------------|---------------|
| SI | 3.5332793404  | -0.0613334469 | -0.0709297547 |
| SI | 1.8512715081  | 0.1166140527  | 1.6561261676  |
| SI | 1.6933856496  | -1.6473386069 | -0.3712751809 |
| SI | 0.0102371429  | -0.9084463810 | -2.0712083524 |
| SI | -0.0053205075 | 1.5829332977  | 1.0989593279  |
| SI | 0.0369672993  | -1.4642617136 | 1.4271977676  |
| SI | -1.8160385511 | 0.0679080959  | 1.6764044963  |
| SI | -1.4573487145 | 0.7233052489  | -0.9404855262 |
| SI | -1.6337898965 | -1.6915232326 | -0.3528755901 |
| SI | -3.5117197789 | -0.1548892803 | -0.0319798117 |
| SI | 1.4463939691  | 0.7618668620  | -0.9565421282 |
| AL | -0.0330254610 | 2.7365751043  | -1.1416284149 |

12

Al2Si10

|    |               |               |               |
|----|---------------|---------------|---------------|
| SI | 0.3360462488  | 0.0256584415  | 3.3484565421  |
| SI | -0.0795458444 | 1.7060903052  | 1.6275086766  |
| SI | 0.8824180236  | -1.4957493478 | 1.5089208894  |
| SI | -1.4262788130 | -0.4141993110 | 1.8479454057  |
| AL | -1.1454135466 | -2.0905800448 | 0.0002330324  |
| SI | 1.5996575109  | 1.7322207598  | -0.0003083995 |
| AL | -2.0271270178 | 1.1436447223  | 0.0001474617  |
| SI | -0.0798734602 | 1.7056289419  | -1.6274443184 |
| SI | 0.8819635636  | -1.4961196743 | -1.5089120640 |
| SI | -1.4269346883 | -0.4143889258 | -1.8477742270 |
| SI | 0.3354042847  | 0.0252449910  | -3.3483938925 |
| SI | 2.3444477388  | -0.5040498582 | -0.0003791048 |

12

Al4Si8

|    |               |               |               |
|----|---------------|---------------|---------------|
| AL | -0.2042088875 | -0.5578066621 | 3.6727318096  |
| SI | 0.0586011972  | 1.4871465487  | 2.0504705845  |
| SI | 0.8574697661  | -0.9749416377 | 1.3082265085  |
| AL | -1.7280773339 | -0.3050280223 | 1.3453906559  |
| SI | -0.7615716762 | -2.2814766945 | -0.0000000292 |
| SI | 1.3491736981  | 1.4296146307  | 0.0000000562  |
| SI | -1.1216998928 | 1.9240911842  | 0.0000000446  |
| SI | 0.0586012397  | 1.4871465619  | -2.0504705597 |
| SI | 0.8574696860  | -0.9749415145 | -1.3082265971 |

|    |               |               |               |
|----|---------------|---------------|---------------|
| AL | -1.7280774162 | -0.3050279674 | -1.3453906785 |
| AL | -0.2042089743 | -0.5578066913 | -3.6727317270 |
| SI | 2.7612925938  | -0.4475687358 | -0.0000000847 |

12

Al5Si7

|    |               |               |               |
|----|---------------|---------------|---------------|
| SI | 3.2350712545  | -0.3705161441 | -0.0776434277 |
| AL | 1.7901236632  | 1.1935871944  | 1.3486473599  |
| AL | 1.3683869322  | -2.0887474069 | -0.4412691092 |
| SI | -0.0830175350 | -1.0895268640 | -2.3843697611 |
| SI | -0.7976527061 | 1.0736347648  | 1.0684613326  |
| SI | 0.5072292653  | -1.0377862613 | 1.7885151073  |
| AL | -2.0377437229 | -0.8876963660 | 2.1130010033  |
| AL | -1.2587541243 | 1.0907269693  | -1.6985236676 |
| SI | -1.1010851815 | -1.2873206629 | -0.2191080445 |
| AL | -3.2240067385 | 0.4047840165  | 0.0230381080  |
| SI | 1.3287530366  | 0.4916385861  | -1.2095611840 |
| SI | 0.3869878567  | 2.5686321742  | -0.3894247172 |

12

Al6Si6

|    |               |               |               |
|----|---------------|---------------|---------------|
| SI | 2.3344089817  | -0.0922857023 | -0.9310863284 |
| SI | 2.2918412669  | -0.0995918671 | 1.4328638275  |
| AL | 1.2988952660  | -2.1671981319 | 0.2311422432  |
| AL | 0.2357563520  | -1.1660612928 | -2.0223225098 |
| SI | 0.6135234456  | 1.4760752673  | 1.9834877558  |
| AL | 0.0198275787  | -0.9729344694 | 2.3003056537  |
| AL | -1.7379655370 | 0.7905062565  | 1.3160827342  |
| SI | -1.2108979784 | 0.6683338527  | -1.1172422464 |
| SI | -1.2369708170 | -1.4923452506 | 0.1484706000  |
| AL | -3.4420974451 | -0.9455762573 | -1.3007701813 |
| AL | 0.9857498572  | 1.5882075108  | -2.0842849952 |
| SI | -0.0377789704 | 2.4742800839  | -0.0348835533 |

12

Al8Si4

|    |               |               |               |
|----|---------------|---------------|---------------|
| AL | 2.6519388231  | 0.0670288507  | -0.2427950443 |
| AL | 1.3034590373  | 1.2268611776  | 1.8890817540  |
| AL | 1.1222009819  | -2.1178757854 | -1.0140214378 |
| AL | -1.2923864465 | -1.2265187920 | -1.8902178345 |
| AL | -1.1111305790 | 2.1182069616  | 1.0128798455  |
| SI | 1.1700381753  | -1.2325124742 | 1.3469293063  |
| AL | -0.9362020991 | -0.1890861258 | 2.4020990713  |
| SI | -2.1558491479 | -0.0047408976 | 0.1400172449  |
| AL | -1.0500728243 | -2.2902704528 | 0.5783752030  |
| AL | -1.3447287441 | 1.5424058551  | -1.6931243517 |
| SI | 0.8298611449  | 0.1862342425  | -2.0829148161 |
| SI | 0.9271636786  | 1.9816774402  | -0.5245459404 |

12

Al10Si2

|    |               |               |               |
|----|---------------|---------------|---------------|
| AL | -1.0633037550 | 0.1832820450  | 2.3891468613  |
| AL | 0.6033191627  | 1.9882770109  | 1.4059218383  |
| AL | 1.5738327634  | -0.4828842957 | 1.9926965226  |
| AL | -2.3461455746 | -0.8014854434 | 0.2944987709  |
| AL | -0.2502456344 | -2.2080882958 | 1.3054014320  |
| AL | 2.3854039086  | 0.7746988922  | -0.2772141071 |
| SI | -1.6294406624 | 1.6468244419  | 0.2174441469  |
| AL | 0.3197325316  | 2.2790366124  | -1.3266070649 |
| SI | 0.8978179980  | -0.0743409010 | -2.1694944025 |
| AL | -0.5641346114 | -2.0151321394 | -1.3886390463 |
| AL | -1.6105494922 | 0.4533352096  | -2.0538383742 |
| AL | 1.8784773655  | -1.8201221369 | -0.3893165768 |

12

Al11Si1

|    |               |               |               |
|----|---------------|---------------|---------------|
| AL | 2.4996374697  | -0.1111586078 | 0.9299961933  |
| AL | 0.4311564302  | 0.5460399850  | 2.6801592030  |
| AL | 1.5872372694  | -1.9297398858 | -0.9325354727 |
| AL | -0.6055659305 | -0.6873749851 | -2.4598616647 |
| AL | 0.9281766465  | 2.3683111887  | 0.6638165584  |
| SI | 0.6471895474  | -1.9656085247 | 1.6056717771  |
| AL | -0.3408901478 | -0.1262742684 | 0.2936742362  |
| AL | -1.7572496082 | 1.8242465407  | 1.1768196830  |
| AL | -1.0972685295 | -2.5013684372 | -0.4345096855 |
| AL | -2.6932153014 | -0.0405363294 | -0.7312072340 |
| AL | 1.4424344444  | 0.7538716531  | -1.4409932493 |
| AL | -0.9273502903 | 1.9310016711  | -1.4292673448 |

12



## Al12Si0

|    |               |               |               |
|----|---------------|---------------|---------------|
| AL | -0.1722458601 | -0.3373694964 | 3.9440260163  |
| AL | 1.3953571567  | 1.3320367416  | 2.2913855903  |
| AL | 0.9305238549  | -2.2681337400 | 2.5899957442  |
| AL | -1.1221673443 | 0.6357198091  | 1.6989707139  |
| AL | -0.3877992844 | -1.5621693275 | 0.3659872155  |
| AL | 0.4202394171  | 1.5493896693  | -0.3660470117 |
| AL | -2.1750779412 | 0.6689146941  | -0.8586740750 |
| AL | -0.8981887620 | 2.2553418396  | -2.5900093501 |
| AL | 1.1546640200  | -0.6485283391 | -1.6989426754 |
| AL | -1.3629022310 | -1.3447275895 | -2.2914630966 |
| AL | 0.2048242971  | 0.3246454656  | -3.9439752313 |
| AL | 2.2075366776  | -0.6817187306 | 0.8587461616  |

## 12

## Al0Si12

|    |               |               |               |
|----|---------------|---------------|---------------|
| SI | 3.6883158288  | -0.1305918184 | -0.0653918053 |
| SI | 1.8120971137  | 0.2322619695  | 1.3926328846  |
| SI | 1.6587906320  | -1.6148101918 | -0.3466662640 |
| SI | 0.0075416301  | -0.6897687406 | -1.9208558019 |
| SI | -0.0037363806 | 1.7038163256  | 1.5196381837  |
| SI | 0.0368050267  | -1.3763441156 | 1.4900164381  |
| SI | -1.7818351729 | 0.1847102279  | 1.4136998803  |
| SI | -1.8047305041 | 0.7143464325  | -1.2174899369 |
| SI | -1.5999963109 | -1.6579941531 | -0.3274189443 |
| SI | -3.6656012881 | -0.2275246475 | -0.0218506135 |
| SI | 1.7898792078  | 0.7619521065  | -1.2389736794 |
| SI | -0.0232377823 | 2.1613566048  | -0.7555773414 |

## 13

## Al1Si12

|    |               |               |               |
|----|---------------|---------------|---------------|
| SI | 1.1384714031  | 1.1929554732  | -1.4857889230 |
| SI | -0.0814399890 | 1.8021430561  | 0.7272530864  |
| SI | 0.0641821286  | -0.0552303245 | 2.3575424231  |
| SI | -2.3561765257 | 2.5570802056  | 0.0939818936  |
| SI | -1.2229376918 | 1.1853497833  | -1.5150697473 |
| SI | -1.1723187312 | -1.1642702199 | -1.4754462023 |
| SI | 1.2347947648  | -1.2353510660 | -1.5444577906 |
| SI | 2.2847477093  | 2.2778493058  | 0.2636607859  |
| SI | 2.4027115096  | -2.3651535962 | 0.1678487374  |
| SI | 1.9386494517  | -0.0621849316 | 0.7617766874  |
| SI | 0.1009350957  | -1.9018458537 | 0.7016708388  |
| SI | -2.1900942793 | -2.3572227011 | 0.2616979912  |
| AL | -2.1415248458 | 0.1258808683  | 0.8225692196  |

## 13

## Al2Si11

|    |               |               |               |
|----|---------------|---------------|---------------|
| SI | 1.2016480667  | 1.1880678359  | -1.5214722485 |
| SI | -0.0000000542 | 1.8007585250  | 0.6993519403  |
| SI | 0.0000001061  | -0.0000000795 | 2.4099313210  |
| SI | -2.2596786003 | 2.4099642596  | 0.1831550914  |
| SI | -1.2016480092 | 1.1880679634  | -1.5214723912 |
| SI | -1.2016480488 | -1.1880679082 | -1.5214722792 |
| SI | 1.2016480635  | -1.1880679945 | -1.5214724166 |
| SI | 2.2596785161  | 2.4099643092  | 0.1831551986  |
| SI | 2.2596785895  | -2.4099642192 | 0.1831551560  |
| AL | 2.1306233331  | 0.0000000499  | 0.8409362544  |
| SI | -0.0000000424 | -1.8007585311 | 0.6993519110  |
| SI | -2.2596786451 | -2.4099642520 | 0.1831551512  |
| AL | -2.1306232748 | 0.0000000417  | 0.8409363118  |

## 13

## Al4Si9

|    |               |               |               |
|----|---------------|---------------|---------------|
| AL | -1.0010516975 | 2.9059314842  | -1.5515156188 |
| AL | 1.5552524463  | 1.9340950276  | -0.4317681369 |
| AL | -2.4188948596 | 0.5280879614  | 2.3922939275  |
| AL | 0.5160674063  | 0.1920055380  | 2.4581453812  |
| SI | -0.2257086391 | 0.4912645281  | -2.2500917488 |
| SI | 1.9557433925  | -0.3720382646 | -1.8574870913 |
| SI | -0.9115185901 | -1.6884022241 | -1.3457298329 |
| SI | 1.3416779958  | -2.5338245944 | -1.0452021299 |
| SI | -0.4804910621 | 0.4828805030  | 0.1182785758  |
| SI | -2.0492958876 | 2.1840460803  | 0.5799667844  |
| SI | 2.3013374876  | -0.3649343204 | 0.6075599377  |
| SI | 0.8300085036  | -2.2592335082 | 1.2728746933  |
| SI | -1.4131264858 | -1.4998782002 | 1.0526752489  |

## 13

## Al5Si8

|    |               |               |               |
|----|---------------|---------------|---------------|
| AL | 0.0912878505  | -2.2847535717 | -1.7005013016 |
| AL | -1.6187710827 | 1.6531924080  | -1.6737669054 |
| AL | 2.7333734845  | 1.1974582075  | -0.9007830789 |
| AL | 1.5547531245  | -0.9827598668 | 0.1978812545  |
| AL | 0.3409918947  | 1.8123034324  | 0.2167809659  |
| SI | 0.5044103575  | 0.2364676310  | -1.9166007730 |
| SI | -1.5559405538 | -0.6670679139 | -0.6245459925 |
| SI | 1.1870675735  | -3.4737191211 | 0.2165527546  |
| SI | -1.7303042038 | 3.2432997015  | 0.2622586940  |
| SI | -0.7477187465 | -2.3451595399 | 0.9573802004  |
| SI | -2.2230905730 | 1.0506416004  | 0.9804758047  |
| SI | -0.3646465849 | -0.1679742121 | 2.1139746909  |
| SI | 1.8285204395  | 0.7859357846  | 1.8708936865  |

13

Al7Si6

|    |               |               |               |
|----|---------------|---------------|---------------|
| AL | -0.3283673834 | -1.0353349823 | 3.0346216412  |
| AL | -2.2315881551 | 0.9786266967  | 3.3123325706  |
| SI | -3.4617786596 | 1.3602686135  | 0.8886352505  |
| SI | 0.6605746428  | 2.3080129830  | 0.2685036263  |
| SI | 0.3661623298  | 1.5571858017  | 2.9476281279  |
| SI | -0.4581190011 | -1.7362303710 | 0.5418742284  |
| AL | -2.9604583347 | -1.2912476158 | 1.0084372837  |
| AL | -1.6701285175 | 2.0488715516  | -1.0012690985 |
| SI | 2.5029851419  | 1.8284161028  | 1.7506562780  |
| SI | 1.6692757927  | -0.3851619867 | 1.2290215321  |
| AL | -1.4201465323 | 3.0876562037  | 1.6596075668  |
| AL | -1.0495082957 | 0.5584434889  | 1.0310162713  |
| AL | 0.2721969622  | 0.0702935141  | -1.2009652782 |

13

Al8Si5

|    |               |               |               |
|----|---------------|---------------|---------------|
| AL | 1.2827611177  | 1.2874070422  | -1.6291937014 |
| AL | -0.3595617997 | 1.9577569161  | 0.4280325344  |
| AL | 0.1551698353  | 0.1584379266  | 2.4170837920  |
| AL | -2.9794509582 | 2.0813824386  | -0.3445491610 |
| SI | -1.2957074942 | 1.3813263369  | -1.9903638475 |
| AL | -1.0797823319 | -1.0871778226 | -1.9415933718 |
| SI | 1.3898047552  | -1.2909483448 | -1.9875655322 |
| AL | 2.0682608894  | 2.0798758858  | 1.3000042015  |
| AL | 2.0964212949  | -2.9695132518 | -0.3392534893 |
| AL | 1.9590931805  | -0.3494385438 | 0.4304573614  |
| SI | 0.5495767107  | -2.2447583924 | 1.5248326750  |
| SI | -1.5375595648 | -1.5444025810 | 0.7474533661  |
| SI | -2.2490256349 | 0.5400523902  | 1.5218941728  |

13

Al10Si3

|    |               |               |               |
|----|---------------|---------------|---------------|
| AL | 0.1407439935  | 0.8723497882  | -2.5604124211 |
| AL | -1.0879737125 | -1.5448839987 | -1.7209211311 |
| AL | 2.4612165128  | 1.1820085612  | -1.1290307775 |
| AL | 0.2751307052  | 2.4941766798  | -0.4041490246 |
| AL | 0.5266682090  | -2.6820180863 | 0.2098882326  |
| AL | -1.6214049971 | -1.2722180111 | 0.9088347949  |
| AL | -0.7415547064 | 1.1250799024  | 1.6332033995  |
| AL | 1.8669211914  | 1.4099320402  | 1.4891917927  |
| AL | -3.4466321702 | 1.9956858685  | 1.2376102954  |
| AL | 0.6368824752  | -1.0007266943 | 2.3350477142  |
| SI | 1.4080852427  | -1.1749326335 | -1.7737723137 |
| SI | -1.5431473967 | 0.7120625254  | -0.6854165180 |
| SI | 2.4072984232  | -0.8911045717 | 0.4883298866  |

13

Al11Si2

|    |               |               |               |
|----|---------------|---------------|---------------|
| AL | -0.1629678689 | -0.1706597380 | 3.6521087302  |
| AL | -2.7237190263 | -0.0980019406 | 2.5332107055  |
| AL | -2.8427634900 | 2.0682310526  | 0.8184605265  |
| AL | -0.3560638861 | 3.3445209006  | 0.8699374787  |
| SI | 1.2254261676  | 1.9079185131  | 2.5636220736  |
| AL | -0.8476011751 | -1.8708418687 | 1.5412413050  |
| AL | -2.6849057896 | -0.6057659447 | -0.3410777081 |
| AL | -1.0399233455 | 1.6344088100  | -1.2330292199 |
| AL | 1.5255255613  | 1.5666351752  | -0.1246931534 |
| AL | 1.6448025101  | -0.6059839425 | 1.5947003941  |
| AL | -1.3998324382 | 2.2707316541  | 3.2040839530  |
| SI | -0.6401393343 | 0.7086920133  | 1.1778474061  |
| AL | 0.1932621047  | -0.8000846844 | -0.7863124912 |

13

## Al12Si1

|    |               |               |               |
|----|---------------|---------------|---------------|
| AL | -0.1917913211 | -0.1995001629 | 3.6516406819  |
| AL | -2.7605688539 | -0.1155635723 | 2.5416293522  |
| AL | -2.8816208774 | 2.0771239851  | 0.8053797565  |
| AL | -0.3875974541 | 3.3486212335  | 0.8422349474  |
| AL | 1.2746386420  | 1.9415289737  | 2.6012234457  |
| AL | -0.8599746028 | -1.9102227917 | 1.5380191031  |
| AL | -2.5223784904 | -0.5029951025 | -0.2211447699 |
| AL | -1.0559232018 | 1.6381270650  | -1.2716780937 |
| AL | 1.5132243497  | 1.5542154337  | -0.1615944693 |
| AL | 1.6341862957  | -0.6387490334 | 1.5748730036  |
| AL | -1.4411142585 | 2.2641785039  | 3.1982067015  |
| SI | -0.6236209845 | 0.7190832459  | 1.1897686600  |
| AL | 0.1936407473  | -0.8260477782 | -0.8184583189 |

## 13

## Al13Si0

|    |               |               |               |
|----|---------------|---------------|---------------|
| AL | -0.1737194232 | -0.1806073834 | 3.7225049449  |
| AL | -2.8129034245 | -0.1702207026 | 2.5473724004  |
| AL | -2.9180276985 | 2.1420050630  | 0.8187388876  |
| AL | -0.4134033709 | 3.3366889631  | 0.7303348425  |
| AL | 1.3435358475  | 1.8495884175  | 2.5895791411  |
| AL | -0.8341196301 | -1.8982598510 | 1.6496809852  |
| AL | -2.5910601719 | -0.4111582803 | -0.2095648089 |
| AL | -1.0738037367 | 1.6190400782  | -1.3424897817 |
| AL | 1.5653801119  | 1.6086523822  | -0.1673560439 |
| AL | 1.6705057867  | -0.7035735522 | 1.5612776319  |
| AL | -1.5271380951 | 2.1909733435  | 3.2209346813  |
| AL | -0.6237613660 | 0.7192152798  | 1.1900074500  |
| AL | 0.2796151607  | -0.7525437575 | -0.8409203301 |

## 13

## Al0Si13

|    |               |               |               |
|----|---------------|---------------|---------------|
| SI | 1.1986071683  | 1.1985982613  | -2.1040994026 |
| SI | 0.0000001232  | 2.2380918819  | 1.4818078379  |
| SI | -0.0000000596 | 0.0000000635  | 2.3740814560  |
| SI | -1.9099184872 | 1.9099616066  | 0.0631060799  |
| SI | -1.1986070822 | 1.1985983240  | -2.1040991749 |
| SI | -1.1986071765 | -1.1985981042 | -2.1040990691 |
| SI | 1.1986070589  | -1.1985981770 | -2.1040992396 |
| SI | 1.9099185366  | 1.9099619431  | 0.0631056858  |
| SI | 1.9099184920  | -1.9099620450 | 0.0631057066  |
| SI | 2.2380692492  | -0.0000000254 | 1.4817572226  |
| SI | 0.0000001282  | -2.2380918155 | 1.4818079747  |
| SI | -1.9099184225 | -1.9099618016 | 0.0631060665  |
| SI | -2.2380695249 | -0.0000001115 | 1.4817578561  |
